# Supplementary material for: A single risk assessment for the most common diseases of ageing, developed and validated on 10 cohort studies
Source: PubMed Central journal article supplement — BMC Med. 2024 Oct 31;22:501. doi: 10.1186/s12916-024-03711-6 (PMC11526665; doi:10.1186/s12916-024-03711-6), 2024-10-31
Supplement: 12916_2024_3711_MOESM1_ESM.pdf [file 12916_2024_3711_MOESM1_ESM.pdf]

## Section S1

**Atherosclerosis Risk in Communities (ARIC):** The ARIC cohort study was conducted in four US communities with 15,792 participants aged 45 through 65 at their baseline using probability sampling. Cohort participants were assessed in two examinations three years apart and follow-up interviews annually. The details of the study procedure were available elsewhere (27). While the study is still ongoing, the dementia was first assessed on Exam 5. Hence, we restrict our analysis to the participants assessed as wave 5 (n=5930). All the participants available for our analysis had follow-up period of approximately 8 years (exam 7).

**Cardiovascular Health Study (CHS):** The CHS cohort study recruited 5,888 adults aged 65 and over from four US communities. Participants of age 65 and older were recruited randomly using a two-step process from the Medicare eligibility lists of the health care financing administration. The cohorts were then followed for a period of three years with semi-annual contacts, alternating telephone calls and clinical assessments. After the initial three years, random samples were selected to produce a cohort with 60:40 female/male ratio in age group: 65-69, 70-74, 75-79 and 80+ age groups. Details of the study participants were described elsewhere (28). The follow-up times varies in CHS datasets according to the outcome types. For MI, stroke and death the follow-up time is 25 years, for diabetes, follow-up time is around 18-20 years and for dementia the follow-up time is the shortest only 5-7 years.

**Framingham Heart Study (FHS):** The FHS cohort study randomly recruited 5209 adults aged between 30 and 62 in 1948 who are free from arteriosclerotic and hypertensive cardiovascular disease. Over time various diagnosis measured was also obtain to new hypothesis using this cohort. Dementia free original cohorts was determined from 1976-1978 corresponding to wave 15. We restricted our analysis to these participants only (n=3288). Detailed of the study methods can be found here (29).

**MRC Cognitive function and Ageing Studies-I (CFAS-I):** The CFAS-1 is a large multi-center population based study conducted in six geographically defined areas in England and Wales in 1991 to 1994. Participants were recruited in a two-stage process, with screening followed by diagnostic assessment with a repeat at 2 years. Diagnostics assessment includes geriatric mental assessment. The screening assessment was available for 13004 adults aged 65 and above. In this study, participants were followed up to 17 years. The details study procedure has been described elsewhere (30).

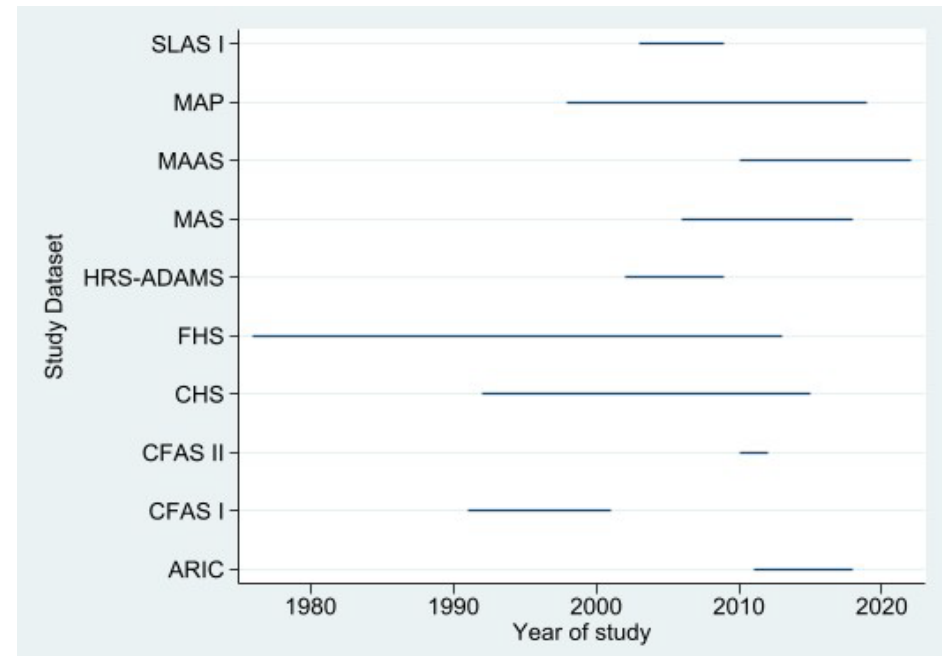

Figure: Timeline of the 10 longitudinal studies considered in DemNCD risk tool

**Cognitive function and Ageing Studies-II (CFAS-II):** The CFAS-II recruited 7762 participants of aged 65 years and over between 2008 and 2011. Sampling was stratified according to age group 65 to 74 year's vs  $\geq 75$  years. Participants were followed-up after two years. Further deaths were collected, but only limited in life data (at 10 years, not used in this analysis). See (31) for detailed study procedure.

**Sydney Memory and Aging Study (MAS):** The MAS study consists of 1037 participants aged 70 to 90 without dementia at baseline (32). The recruitment was conducted randomly in 2005 using electoral roll from two areas of Sydney, Australia. Detailed neuropsychiatric and medical assessments and blood biomarkers were obtained. Participants are followed up with brief telephone reviews annually, and with detailed assessment every two years. A total of 12 years follow-up data are available for our analysis.

**Maastricht Aging Study (MAAS):** Maastricht longitudinal study comprises four independent panel studies with 1823 healthy adults aged between 24 and 81. The sample was drawn from a patient register of collaborating general practitioners, stratified by age, sex and general ability level. Individuals were followed up for 12 years with repeated assessments of blood pressure, medical history, lifestyle, anthropomorphic and neurocognitive measures at 6 and 12 years. 491 individuals aged 65 and over at baseline are considered for our analysis.

**The Health and Retirement Study - Aging, Demographics and Memory Study (HRS ADAMS):** The HRS ADAMS is a supplementary study in the HRS that conducted in-person clinical assessments to gather information on cognitive status. The study consisted of 856 community-based individuals aged 70 years and above who were assessed in 2001 (baseline) and followed through to 2008. The mean age of participants at baseline was 81.6 years and 41.5% were males.

**The Rush Memory and Aging Project (MAP):** The MAP comprised 2,192 participants aged 60 years and older in the greater Chicago area. All participants agreed to an annual detailed clinical evaluation. The study has a rolling recruitment starting in 1997 to present. Up to 22 years of follow-up with an overall follow-up rate of more than 90% were used at the time of these analyses. In this study we excluded 80 participants aged below 65 at baseline. The study was approved by an Institutional Review Board of Rush University Medical Center. All participants signed informed and repository consents.

**Singapore Longitudinal Ageing Study-I (SLAS-I):** The SLAS consists of 2805 individuals of aged 55 years and above who were Singaporean residents in contiguous precincts in the South East region of Singapore. Invitations to the participants were given by door-to-door census with a very rate of response rate to the study (78.2%). In the current study we have included 1407 individuals of age 65 and over at baseline. Participants were followed-up every 3 years, with a total of 6 years follow-up data are available for our analysis.

**Table S1: Definition of each of outcome presented in the paper**

| <b>Outcome</b>  | <b>Definition</b>                                                                                                                                                                                                                                                                                                                                                                                                                                                                                             |
|-----------------|---------------------------------------------------------------------------------------------------------------------------------------------------------------------------------------------------------------------------------------------------------------------------------------------------------------------------------------------------------------------------------------------------------------------------------------------------------------------------------------------------------------|
| <b>Diabetes</b> | Derived variables for diabetes based on WHO guidelines or American Diabetes Association guidelines were available in the CHS based on blood glucose $\geq 200$ mg/dl for $< 8$ hrs fasting $\geq 126$ mg/dl for $> 8$ hours fasting. For ARIC and FHS diabetes variable was calculated based on blood glucose $> 140$ mg/dl, Self-reported diabetes will be considered in the MAP, CFAS-I and CFAS-II, MAS, SLAS-I, and MAAS. Medical history of diabetes were used for HRS-ADAMS.                            |
| <b>Stroke</b>   | MAP uses clinical diagnosis of stroke. For the ARIC study, a diagnostic computer algorithm created variable will be used to define stroke. For the CHS cognition study, special cerebrovascular subcommittees defined the criteria for stroke and TIA while in the FHS, stroke cases were reviewed by neurologists. Where clinical diagnosis is not available, for example CFAS-I and CFAS-II, MAS, MAAS, SLAS I and HRS ADAMS self-reported stroke will be used.                                             |
| <b>MI</b>       | Clinical diagnosis of MI was used in FHS. Self-reported history of heart attack were used (ARIC, CHS, CFAS-I, CFAS-II, MAS, MAAS and SLAS I). MI was also defined based on history of heart attack, MI or coronary thrombosis (HRS-ADAMS). In MAP was defined as self-reported history of heart attack, coronary thrombosis, coronary occlusion, or myocardial infarction.                                                                                                                                    |
| <b>Dementia</b> | All included studies diagnosed dementia through the Diagnostic and Statistical Manual of Mental Disorders (DSM-III-R, IV criteria) or ICD codes. We chose to study all- type dementia instead of specific types for two reasons, one, as there are no tools available to understand the different dementia pathologies to predict dementia types and two, as we intend to build a tool which is simple and facilitates public participation. Algorithms were used for diagnosis of dementia in ARIC and CFAS. |
| <b>Death</b>    | Date/year of death or age at death are available in all studies.                                                                                                                                                                                                                                                                                                                                                                                                                                              |

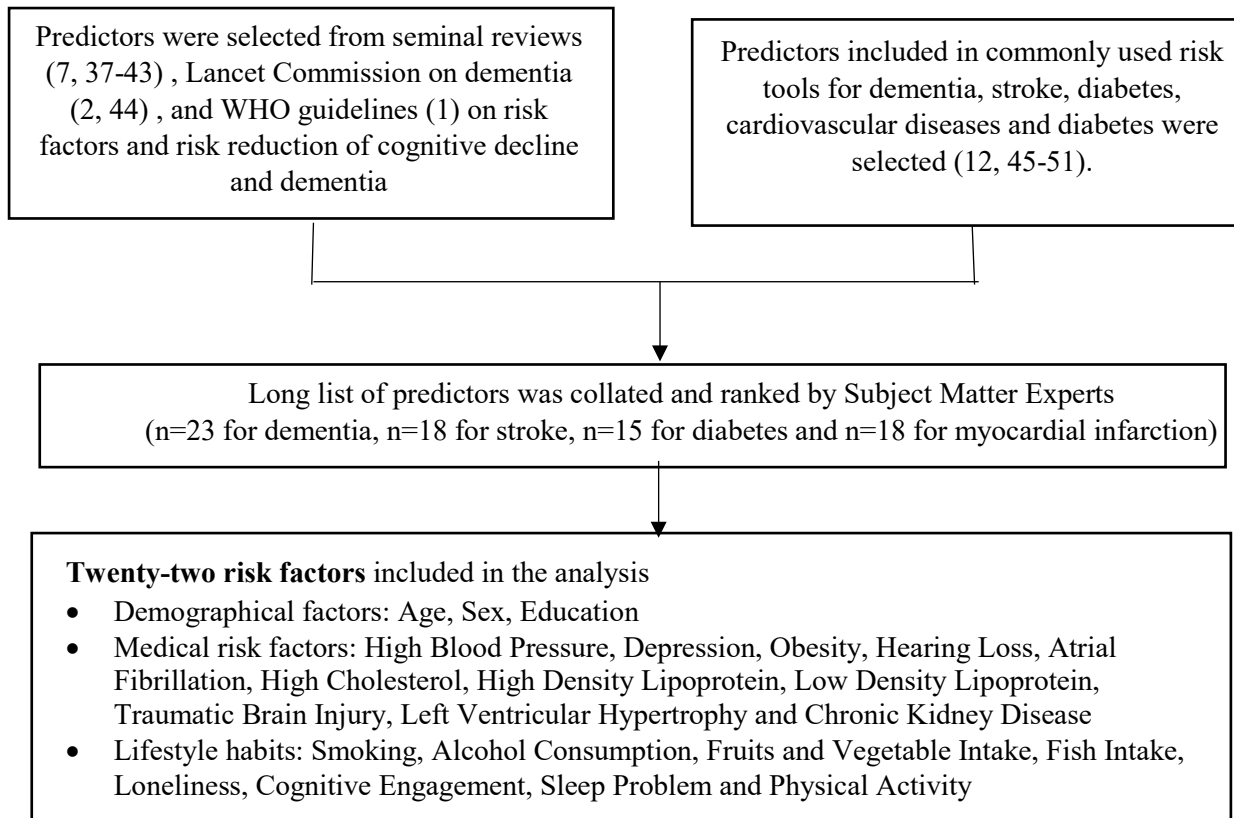

Figure S1: Flowchart showing the process of selecting predictors for the four outcomes

**Table S2: Distribution of covariates and outcome in each of the dataset under investigation**

|                            | <b>ARIC<br/>n=5930</b> | <b>CFAS-I<br/>n=13004</b> | <b>CFAS-II<br/>n=7762</b> | <b>CHS<br/>n=5888</b> | <b>FHS<br/>n=3288</b> | <b>HRS-ADAMS<br/>n=856</b> | <b>MAS<br/>n=1037</b> | <b>MAAS<br/>n=491</b> | <b>MAP<br/>n=2112</b> | <b>SLAS-I<br/>n=1407</b> |
|----------------------------|------------------------|---------------------------|---------------------------|-----------------------|-----------------------|----------------------------|-----------------------|-----------------------|-----------------------|--------------------------|
| <b>Age group</b>           |                        |                           |                           |                       |                       |                            |                       |                       |                       |                          |
| 65-69                      | 610 (10.3)             | 3184 (24.5)               | 2301 (29.6)               | 2021 (34.3)           | 740 (22.5)            |                            |                       | 173 (35.2)            | 163 (7.7)             | 632 (44.9)               |
| 70-74                      | 2146 (36.2)            | 3150 (24.2)               | 1830 (23.6)               | 1873 (31.8)           | 810 (24.6)            | 166 (19.4)                 | 268 (25.8)            | 161 (32.8)            | 265 (12.5)            | 410 (29.1)               |
| 75-79                      | 1669 (28.1)            | 2906 (22.3)               | 1590 (20.5)               | 1198 (20.3)           | 784 (23.8)            | 188 (22.0)                 | 358 (34.5)            | 132 (26.9)            | 497 (23.5)            | 226 (16.1)               |
| 80-84                      | 1067 (18.0)            | 2256 (17.3)               | 1171 (15.1)               | 571 (9.7)             | 704 (21.4)            | 218 (25.5)                 | 277 (26.7)            | 25 (5.1)              | 615 (29.1)            | 82 (5.8)                 |
| 85-89                      | 432 (7.3)              | 1092 (8.4)                | 637 (8.2)                 | 177 (3.0)             | 249 (7.6)             | 149 (17.4)                 | 127 (12.2)            |                       | 395 (18.7)            | 38 (2.7)                 |
| 90+                        | 6 (0.1)                | 416 (3.2)                 | 233 (3.0)                 | 48 (0.8)              | 1 (0.0)               | 135 (15.8)                 | 7 (0.7)               |                       | 177 (8.4)             | 19 (1.4)                 |
| <b>Sex</b>                 |                        |                           |                           |                       |                       |                            |                       |                       |                       |                          |
| Male                       | 2505 (42.2)            | 5157 (39.7)               | 3534 (45.5)               | 2495 (42.4)           | 1492 (45.4)           | 355 (41.5)                 | 465 (44.8)            | 252 (51.3)            | 565 (26.8)            | 559 (39.7)               |
| <b>Education</b>           |                        |                           |                           |                       |                       |                            |                       |                       |                       |                          |
| Primary                    | 827 (13.9)             | 930 (7.2)                 | 276 (3.6)                 | 904 (15.4)            | 1118 (34.0)           | 291 (34.0)                 | 161 (15.5)            | 204 (41.5)            | 64 (3.0)              | 935 (66.5)               |
| Secondary                  | 2491 (42.0)            | 9800 (75.4)               | 5690 (73.3)               | 828 (14.1)            | 1211 (36.8)           | 347 (40.5)                 | 433 (41.8)            | 191 (38.9)            | 84 (4.0)              | 326 (23.2)               |
| Tertiary                   | 2602 (43.9)            | 1937 (14.9)               | 1671 (21.5)               | 4139 (70.3)           | 825 (25.1)            | 218 (25.5)                 | 443 (42.7)            | 84 (17.1)             | 1964 (93.0)           | 146 (10.4)               |
| Missing                    | 10 (0.2)               | 337 (2.6)                 | 125 (1.6)                 | 17 (0.3)              | 134 (4.1)             | 0 (0.0)                    | 0 (0.0)               | 12 (2.4)              | 0 (0.0)               | 0 (0)                    |
| <b>Obesity</b>             |                        |                           |                           |                       |                       |                            |                       |                       |                       |                          |
| Under weight               | 60 (1.0)               | NA                        | NA                        | 98 (1.7)              | 41 (1.2)              | 32 (3.7)                   | 11 (1.1)              | 2 (0.4)               | 37 (1.8)              | 100 (7.1)                |
| Normal weight              | 1414 (23.8)            |                           |                           | 2170 (36.9)           | 876 (26.6)            | 317 (37.0)                 | 319 (30.8)            | 111 (22.6)            | 702 (33.2)            | 853 (60.6)               |
| Over weight                | 2271 (38.3)            |                           |                           | 2435 (41.4)           | 921 (28.0)            | 296 (34.6)                 | 444 (42.8)            | 256 (52.1)            | 805 (38.1)            | 379 (26.9)               |
| Obese                      | 1946 (32.8)            |                           |                           | 1166 (19.8)           | 313 (9.5)             | 167 (19.5)                 | 236 (22.8)            | 121 (24.6)            | 501 (23.7)            | 70 (5.0)                 |
| Missing                    | 239 (4.0)              |                           |                           | 19 (0.3)              | 1137 (34.6)           | 44 (5.1)                   | 27 (2.6)              | 1 (0.2)               | 67 (3.2)              | 5 (0.4)                  |
| <b>Smoke</b>               |                        |                           |                           |                       |                       |                            |                       |                       |                       |                          |
| Never                      | 2174 (36.7)            | 4352 (33.5)               | 2898 (37.3)               | 2738 (46.5)           | 1599 (48.6)           | 423 (49.4)                 | 476 (45.9)            | 166 (33.8)            | 1217 (57.6)           | 1114 (79.2)              |
| Former                     | 2725 (46.0)            | 5890 (45.3)               | 3825 (49.3)               | 2444 (41.5)           | 1454 (44.2)           | 342 (40.0)                 | 514 (49.6)            | 212 (43.2)            | 832 (39.4)            | 188 (13.4)               |
| Current                    | 325 (5.5)              | 2370 (18.2)               | 810 (10.4)                | 700 (11.9)            | 235 (7.1)             | 77 (9.0)                   | 40 (3.9)              | 98 (20.0)             | 50 (2.4)              | 103 (7.3)                |
| Missing                    | 706 (11.9)             | 392 (3.0)                 | 229 (3.0)                 | 6 (0.1)               | 0 (0.0)               | 14 (1.6)                   | 7 (0.7)               | 15 (3.1)              | 13 (0.6)              | 2 (0.1)                  |
| <b>High blood pressure</b> |                        |                           |                           |                       |                       |                            |                       |                       |                       |                          |
| Yes                        | 1495 (25.2)            | 8548 (65.7)               | 3575 (46.1)               | 3267 (55.5)           | 2237 (68.0)           | 312 (36.4)                 | 176 (17.0)            | 306 (62.3)            | 612 (29.0)            | 658 (46.8)               |
| Missing                    | 4350 (73.4)            | 4101 (31.5)               | 3834 (49.4)               | 2614 (44.4)           | 1051 (32.0)           | 524 (61.2)                 | 861 (83.0)            | 185 (37.7)            | 1500 (71.0)           | 749 (53.2)               |
| <b>Physical activity</b>   |                        |                           |                           |                       |                       |                            |                       |                       |                       |                          |
| Less than sufficient       | 1998 (33.7)            | NA                        | NA                        | 2056 (34.9)           | 12 (0.4)              | NA                         | NA                    | 274 (55.8)            | 788 (37.3)            | NA                       |
| Sufficient                 | 3413 (57.6)            |                           |                           | 3812 (64.7)           | 1748 (53.2)           |                            |                       | 129 (26.3)            | 1317 (62.4)           |                          |
| Missing                    | 519 (8.8)              |                           |                           | 20 (0.3)              | 1528 (46.5)           |                            |                       | 88 (17.9)             | 7 (0.3)               |                          |

|                                    |             |              |             |             |             |            |            |            |             |             |
|------------------------------------|-------------|--------------|-------------|-------------|-------------|------------|------------|------------|-------------|-------------|
| <b>High Cholesterol</b>            |             |              |             |             |             |            |            |            |             |             |
| Yes                                | 516 (8.7)   | NA           | NA          | 1241 (21.1) | 1104 (33.6) | 274 (32.0) | NA         | 61 (12.4)  | 185 (8.8)   | 249 (17.7)  |
| Missing                            | 82 (1.4)    |              |             | 56 (1)      | 689 (21.0)  | 77 (9.0)   |            | 11 (2.2)   | 597 (28.3)  | 23 (1.6)    |
| <b>HDL</b>                         |             |              |             |             |             |            |            |            |             |             |
| High                               | 3941 (66.5) | NA           | NA          | 3939 (66.9) | 593 (18.0)  | NA         | NA         | NA         | NA          | 1021 (72.6) |
| Missing                            | 82 (1.4)    |              |             | 64 (1.1)    | 2089 (63.5) |            |            |            |             | 23 (1.6)    |
| <b>LDL</b>                         |             |              |             |             |             |            |            |            |             |             |
| Low                                | 5440 (91.7) | NA           | NA          | 4710 (80.0) | NA          | NA         | NA         | NA         | 1419 (67.2) | 1139 (81.0) |
| Missing                            | 118 (2.0)   |              |             | 136 (2.3)   |             |            |            |            | 613 (29.0)  | 32 (2.3)    |
| <b>TBI</b>                         |             |              |             |             |             |            |            |            |             |             |
| Yes                                | 1242 (20.9) | 1433 (11.0)  | 837 (10.8)  | NA          | 37 (1.1)    | 48 (5.6)   | 135 (13)   | 14 (2.9)   | 123 (5.8)   | NA          |
| Missing                            | 4 (0.1)     | 349 (2.7)    | 354 (4.6)   |             | 2787 (84.8) | 95 (11.1)  | 48 (4.6)   | 3 (0.6)    | 278 (13.2)  |             |
| <b>Depression</b>                  |             |              |             |             |             |            |            |            |             |             |
| Yes                                | 398 (6.7)   | 1108 (8.5)   | 506 (6.5)   | 1016 (17.3) | 104 (3.2)   | 10 (1.2)   | 107 (10.3) | 112 (22.8) | 225 (10.7)  | 149 (10.6)  |
| Missing                            | 112 (1.9)   | 347 (2.7)    | 74 (1.0)    | 10 (0.2)    | 3064 (93.2) | 81 (9.5)   | 5 (0.5)    | 12 (2.4)   | 15 (0.7)    | 3 (0.2)     |
| <b>Alcohol consumption</b>         |             |              |             |             |             |            |            |            |             |             |
| Abstain                            | 3813 (64.3) | 1509 (11.6)  | 1418 (18.3) | 2937 (49.9) | NA          | 320 (37.4) | 130 (12.5) | 124 (25.3) | NA          | 1281 (91.0) |
| Moderate                           | 1600 (27.0) | 795 (6.1)    | 4186 (53.9) | 2552 (43.3) |             | 402 (47.0) | 554 (53.4) | 256 (52.1) |             | 91 (6.5)    |
| Heavy                              | 138 (2.3)   | 413 (3.2)    | 1704 (22.0) | 375 (6.4)   |             | 120 (14.0) | 352 (33.9) | 83 (16.9)  |             | 30 (2.1)    |
| Missing                            | 379 (6.4)   | 10287 (79.1) | 454 (5.8)   | 24 (0.4)    |             | 14 (1.6)   | 1 (0.1)    | 28 (5.7)   |             | 5 (0.4)     |
| <b>Fruits and vegetable intake</b> |             |              |             |             |             |            |            |            |             |             |
| ≥ 5 serves/week                    | 4934 (83.2) | NA           | 6986 (90.0) | NA          | NA          | NA         | 100 (9.6)  | NA         | NA          | 119 (8.5)   |
| Missing                            | 297 (5.0)   |              | 0 (0.0)     |             |             |            | 63 (6.1)   |            |             | 1282 (91.1) |
| <b>Fish intake</b>                 |             |              |             |             |             |            |            |            |             |             |
| ≥ 2 serves/week                    | 2314 (39.0) | NA           | 1813 (23.4) | 2589 (44.0) | 69 (2.1)    | NA         | 625 (60.3) | NA         | 911 (43.1)  | 684 (48.6)  |
| Missing                            | 299 (5.0)   |              | 1982 (25.5) | 738 (12.5)  | 3064 (93.2) |            | 63 (6.1)   |            | 1082 (51.2) | 614 (43.6)  |
| <b>Cognitive engagement</b>        |             |              |             |             |             |            |            |            |             |             |
| Low                                | NA          | NA           | 5241 (67.5) | NA          | NA          | 596 (69.6) | 96 (9.3)   | NA         | 843 (39.9)  | 1163 (82.7) |
| Moderate                           |             |              | 780 (10.0)  |             |             | 122 (14.3) | 452 (43.6) |            | 1077 (51.0) | 109 (7.7)   |
| High                               |             |              | 1505 (19.4) |             |             | 19 (2.2)   | 453 (43.7) |            | 183 (8.7)   | 119 (8.5)   |
| Missing                            |             |              | 236 (3.0)   |             |             | 119 (13.9) | 36 (3.5)   |            | 9 (0.4)     | 16 (1.1)    |
| <b>Loneliness</b>                  |             |              |             |             |             |            |            |            |             |             |
| Yes                                | NA          | 131 (1.0)    | 262 (3.4)   | 459 (7.8)   | 68 (2.1)    | NA         | NA         | 65 (13.2)  | 185 (8.8)   | 188 (13.4)  |
| Missing                            |             | 10623 (81.7) | 294 (3.8)   | 8 (0.1)     | 2571 (78.2) |            |            | 0 (0.0)    | 236 (11.2)  | 93 (6.6)    |

|                                     |             |              |             |             |             |            |            |            |             |            |
|-------------------------------------|-------------|--------------|-------------|-------------|-------------|------------|------------|------------|-------------|------------|
| <b>Atrial Fibrillation</b>          |             |              |             |             |             |            |            |            |             |            |
| Yes                                 | 1528 (25.8) | NA           | NA          | 236 (4.0)   | 680 (20.7)  | 28 (3.3)   | 69 (6.7)   | NA         | NA          | 18 (1.3)   |
| Missing                             | 0 (0.0)     |              |             | 1418 (24.1) | 0 (0)       | 522 (61.0) | 14 (1.4)   |            |             | 0 (0.0)    |
| <b>Hearing loss</b>                 |             |              |             |             |             |            |            |            |             |            |
| Yes                                 | 702 (11.8)  | 2798 (21.5)  | 1376 (17.7) | 443 (7.5)   | 491 (14.9)  | NA         | 357 (34.4) | NA         | NA          | 55 (3.9)   |
| Missing                             | 0 (0.0)     | 358 (2.8)    | 290 (3.7)   | 230 (3.9)   | 2219 (67.5) |            | 9 (0.9)    |            |             | 0 (0.0)    |
| <b>Sleep problem</b>                |             |              |             |             |             |            |            |            |             |            |
| Yes                                 | NA          | 2496 (19.2)  | NA          | 1310 (22.2) | 108 (3.3)   | NA         | NA         | NA         | NA          | 381 (27.1) |
| Missing                             |             | 391 (3.0)    |             | 101 (1.7)   | 2397 (72.9) |            |            |            |             | 14 (1.0)   |
| <b>Left ventricular hypertrophy</b> |             |              |             |             |             |            |            |            |             |            |
| Yes                                 | 2 (0.0)     | NA           | NA          | 283 (4.8)   | 396 (12)    | NA         | NA         | NA         | NA          | NA         |
| Missing                             | 4983 (84.0) |              |             | 217 (3.7)   | 0 (0)       |            |            |            |             |            |
| <b>Chronic kidney disease</b>       |             |              |             |             |             |            |            |            |             |            |
| Yes                                 | NA          | NA           | NA          | 85 (1.4)    | NA          | NA         | NA         | NA         | NA          | 11 (0.8)   |
| Missing                             |             |              |             | 481 (8.2)   |             |            |            |            |             | 0 (0.0)    |
| <b>Outcomes</b>                     |             |              |             |             |             |            |            |            |             |            |
| <b>Diabetes</b>                     |             |              |             |             |             |            |            |            |             |            |
| Incident                            | 509 (8.6)   | 233 (1.8)    | 107 (1.4)   | 466 (7.9)   | 158 (4.8)   | 19 (2.2)   | 17 (1.6)   | 45 (9.2)   | 144 (6.8)   | 38 (2.7)   |
| Prevalent                           | 1699 (28.7) | 755 (5.8)    | 1046 (13.5) | 925 (15.7)  | 490 (14.9)  | 171 (20.0) | 126 (12.2) | 36 (7.3)   | 279 (13.2)  | 239 (17.0) |
| Missing                             | 43 (0.7)    | 0 (0.0)      | 231 (3.0)   | 210 (3.6)   | 0 (0.0)     | 5 (0.6)    | 4 (0.4)    | 0 (0.0)    | 1 (0.1)     | 0 (0.0)    |
| <b>Stroke</b>                       |             |              |             |             |             |            |            |            |             |            |
| Incident                            | 984 (16.6)  | 367 (2.8)    | 71 (0.9)    | 1159 (19.7) | 438 (13.3)  | 15 (1.8)   | 41 (4.0)   | 3 (0.6)    | 127 (6.0)   | 24 (1.7)   |
| Prevalent                           | 242 (4.1)   | 905 (7.0)    | 572 (7.4)   | 249 (4.2)   | 208 (6.3)   | 210 (24.5) | 41 (4.0)   | 0 (0.0)    | 179 (8.5)   | 69 (4.9)   |
| Missing                             | 4 (0.1)     | 0 (0.0)      | 232 (3.0)   | 0 (0.0)     | 0 (0.0)     | 10 (1.2)   | 10 (1.0)   | 145 (29.5) | 33 (1.6)    | 0 (0.0)    |
| <b>MI</b>                           |             |              |             |             |             |            |            |            |             |            |
| Incident                            | 917 (15.5)  | 133 (1.0)    | 42 (0.5)    | 1082 (18.4) | 263 (8.0)   | 4 (0.5)    | 31 (3.0)   | 32 (6.5)   | 100 (4.7)   | 25 (1.8)   |
| Prevalent                           | 457 (7.7)   | 1301 (10.0)  | 801 (10.3)  | 562 (9.5)   | 234 (7.1)   | 127 (14.8) | 120 (11.6) | 41 (8.4)   | 194 (9.2)   | 61 (4.3)   |
| Missing                             | 293 (4.9)   | 0 (0.0)      | 232 (3.0)   | 0 (0.0)     | 6 (0.2)     | 13 (1.5)   | 3 (0.3)    | 0 (0.0)    | 1 (0.1)     | 0 (0.0)    |
| <b>Dementia</b>                     |             |              |             |             |             |            |            |            |             |            |
| Incident                            | 901 (15.2)  | 1307 (10.1)  | 173 (2.2)   | 480 (8.2)   | 704 (21.4)  | 106 (12.4) | 219 (21.1) | 54 (11.0)  | 481 (22.8)  | 81 (5.8)   |
| Prevalent                           | 296 (5.0)   | 0 (0.0)      | 461 (5.9)   | 227 (3.9)   | 0 (0.0)     | 308 (36.0) | 0 (0.0)    | 0 (0.0)    | 116 (5.5)   | 0 (0.0)    |
| Missing                             | 0 (0.0)     | 0 (0.0)      | 6 (0.1)     | 2513 (42.7) | 1760 (53.5) | 0 (0.0)    | 0 (0.0)    | 0 (0.0)    | 0 (0.0)     | 0 (0.0)    |
| <b>Death</b>                        |             |              |             |             |             |            |            |            |             |            |
|                                     | 988 (16.7)  | 12665 (97.4) | 3626 (46.7) | 5340 (90.7) | 3281 (99.8) | 142 (16.6) | 353 (34)   | 160 (32.6) | 1139 (53.9) | 253 (18.0) |

Note: NA: Not available

**Table S3: Definition of covariates used in the process of harmonization of covariates from different cohort dataset.**

| <b>Covariates</b>            | <b>Definition</b>                                                                                                                                                                                                                                      |
|------------------------------|--------------------------------------------------------------------------------------------------------------------------------------------------------------------------------------------------------------------------------------------------------|
| Age of the participants      | Age at baseline                                                                                                                                                                                                                                        |
| Education                    | Education at baseline were categorized as less than secondary (0-8), upper secondary (9-11) and tertiary (12 and above) based on years of schooling or grades.                                                                                         |
| Obesity                      | Obesity was defined based on BMI categorization according to WHO guidelines: underweight (BMI <18.5), normal (BMI 18.5-24.9), overweight (BMI 25-29.9) and obese (BMI >30).                                                                            |
| Smoking status               | Self reported smoking status were obtained.                                                                                                                                                                                                            |
| High blood pressure          | Hypertension was defined based on average systolic blood pressure $\geq 140$ or diastolic $\geq 90$ or history of hypertension variable.                                                                                                               |
| Physical activity            | Physical activity was scored as the number of self-reported hours of performing activities at each of three intensity levels: mild, moderate and vigorous activities                                                                                   |
| High Cholesterol             | Calculated as $>6.2$ mmol/L or $>240$ mg/dl or using medical history (HRS-ADAMS, MAAS).                                                                                                                                                                |
| Low HDL                      | $<1.0$ mmol/L for male and $<1.3$ mmol/L for female or $<40$ mg/dl for male and $<50$ mg/dl for female.                                                                                                                                                |
| High LDL                     | $>4.1$ mmol/L or $>160$ mg/dl                                                                                                                                                                                                                          |
| TBI                          | Defined as self reported history of brain injury / head injury/ knock out with or without consciousness                                                                                                                                                |
| Depression                   | Self reported depression symptoms measured by the respective scales (CIDI for HRS-ADAMS; CESD for ARIC, CHS, FHS,MAP; Geriatric mental state exam for CFAS-I, CFAS-II, GDS for SLAS & MAS and SL-90 for MASS) of depression used by different studies. |
| Alcohol consumption          | Self reporting drinking was categorized as abstainer, moderate drinker ( $<14$ drinks per week) and heavy drinker ( $\geq 14$ drinks per week).                                                                                                        |
| Fruits and vegetable intake  | Calculated as at least 5 servings of vegetables or 3 servings of vegetables and 2 fruits daily.                                                                                                                                                        |
| Fish intake                  | Calculated as $\geq 2$ serves per week.                                                                                                                                                                                                                |
| Cognitive engagement         | Cognitive engagement was a composite measure of life engagement based on the RIASEC scales.                                                                                                                                                            |
| Loneliness                   | Self-reported loneliness at baseline.                                                                                                                                                                                                                  |
| Atrial Fibrillation          | Self-reported history of Atrial Fibrillation (HRS-ADAMS, CHS, MAS, ARIC) and Atrial Fibrillation based on ECG (SLAS, FHS) were used.                                                                                                                   |
| Hearing loss                 | Self-reported hearing problem (CFAS-I, CHS, FHS, SLAS), Recommendation/wear a hearing aid (MAS, CFAS-II), Hearing impaired indicated in CIU or hearing problem without aid (ARIC)                                                                      |
| Sleep problem                | Sleep problem was defined as trouble falling sleeping (CHS), trouble falling asleep/wake up at night or too early (FHS); Never or sometimes (less than once a week) had good sleep (SLAS) and Often or all the time had sleep problem (CFAS)           |
| Left ventricular hypertrophy | Left ventricular hypertrophy conformed by ECG                                                                                                                                                                                                          |
| Chronic kidney disease       | Self-reported kidney failure or kidney disease                                                                                                                                                                                                         |



**Table S4: Regression coefficients (95% CI) obtained through meta-analysis following logistic regression model.**

| Covariates                 | Dementia                    |                             | Stroke                   |                             | MI                  |                          | Diabetes                    |                             |
|----------------------------|-----------------------------|-----------------------------|--------------------------|-----------------------------|---------------------|--------------------------|-----------------------------|-----------------------------|
|                            | Male                        | Female                      | Male                     | Female                      | Male                | Female                   | Male                        | Female                      |
| <b>Age</b>                 |                             |                             |                          |                             |                     |                          |                             |                             |
| 65-69                      | <b>-0.42 (-0.71, -0.13)</b> | <b>-0.55 (-0.90, -0.20)</b> | -0.12 (-0.35, 0.12)      | -0.06 (-0.24, 0.13)         | 0.14 (-0.10, 0.38)  | 0.14 (-0.12, 0.39)       | 0.14 (-0.25, 0.53)          | 0.19 (-0.04, 0.41)          |
| 70-74                      | Ref                         | Ref                         | Ref                      | Ref                         | Ref                 | Ref                      | Ref                         | Ref                         |
| 75-79                      | <b>0.60 (0.37, 0.82)</b>    | <b>0.44 (0.18, 0.69)</b>    | 0.04 (-0.18, 0.25)       | 0.16 (-0.02, 0.34)          | 0.14 (-0.09, 0.38)  | 0.14 (-0.07, 0.35)       | 0.01 (-0.28, 0.30)          | -0.25 (-0.49, 0.00)         |
| 80-84                      | <b>0.91 (0.44, 1.39)</b>    | <b>1.07 (0.62, 1.52)</b>    | 0.23 (-0.01, 0.47)       | 0.13 (-0.26, 0.52)          | 0.06 (-0.34, 0.46)  | 0.03 (-0.26, 0.33)       | -0.35 (-0.87, 0.17)         | -0.42 (-0.75, -0.08)        |
| 85-89                      | <b>1.37 (1.04, 1.70)</b>    | <b>1.64 (1.20, 2.07)</b>    | -0.17 (-0.55, 0.21)      | 0.01 (-0.41, 0.44)          | -0.34 (-1.15, 0.48) | 0.05 (-0.34, 0.44)       | -0.61(-1.33, 0.11)          | -0.74 (-1.63, 0.14)         |
| 90+                        | <b>2.08 (1.42, 2.74)</b>    | <b>1.73 (0.86, 2.60)</b>    | -0.37 (-1.65, 0.90)      | -1.00 (-2.04, 0.04)         | 0.47 (-0.50, 1.44)  | -0.23 (-1.25, 0.79)      | *                           | *                           |
| <b>Education</b>           |                             |                             |                          |                             |                     |                          |                             |                             |
| Less than secondary        | <b>0.38 (0.08, 0.67)</b>    | 0.21 (-0.01, 0.43)          | -0.06 (-0.31, 0.19)      | 0.14 (-0.07, 0.34)          | 0.04 (-0.24, 0.32)  | 0.36 (-0.11, 0.82)       | -0.01 (-0.37, 0.35)         | <b>0.33 (0.04, 0.61)</b>    |
| Upper secondary            | <b>0.22 (0.01, 0.43)</b>    | 0.16 (-0.03, 0.35)          | 0.04 (-0.17, 0.24)       | 0.11 (-0.08, 0.31)          | -0.06 (-0.31, 0.18) | 0.22 (-0.01, 0.45)       | -0.06 (-0.34, 0.22)         | 0.17 (-0.08, 0.42)          |
| Tertiary                   | Ref                         | Ref                         | Ref                      | Ref                         | Ref                 | Ref                      | Ref                         | Ref                         |
| <b>Obesity</b>             |                             |                             |                          |                             |                     |                          |                             |                             |
| Underweight                | 0.35 (-0.72, 1.42)          | 0.05 (-0.77, 0.88)          | 0.17 (-0.96, 1.31)       | -0.32 (-0.97, 0.33)         | 0.46 (-0.61, 1.53)  | -0.26 (-1.00, 0.49)      | *                           | -0.59 (-1.75, 0.58)         |
| Normal Weight              | Ref                         | Ref                         | Ref                      | Ref                         | Ref                 | Ref                      | Ref                         | Ref                         |
| Overweight                 | -0.02 (-0.25, 0.21)         | -0.14 (-0.32, 0.04)         | 0.05 (-0.18, 0.28)       | -0.10 (-0.27, 0.07)         | 0.26 (0.04, 0.48)   | 0.12 (-0.08, 0.32)       | <b>0.61 (0.26, 0.97)</b>    | 0.18 (-0.06, 0.42)          |
| Obese                      | 0.09 (-0.21, 0.39)          | <b>-0.39 (-0.61, -0.16)</b> | -0.01 (-0.34, 0.31)      | <b>-0.21 (-0.41, -0.01)</b> | 0.16 (-0.14, 0.45)  | 0.18 (-0.22, 0.57)       | <b>0.92 (0.45, 1.38)</b>    | <b>0.87 (0.43, 1.30)</b>    |
| <b>Alcohol Consumption</b> |                             |                             |                          |                             |                     |                          |                             |                             |
| Low                        | Ref                         | Ref                         | Ref                      | Ref                         | Ref                 | Ref                      | Ref                         | Ref                         |
| Moderate                   | <b>-0.27 (-0.50, -0.04)</b> | <b>-0.31 (-0.50, -0.13)</b> | 0.08 (-0.12, 0.28)       | -0.09 (-0.26, 0.09)         | 0.02 (-0.28, 0.32)  | -0.12 (-0.53, 0.28)      | <b>-0.29 (-0.56, -0.01)</b> | <b>-0.32 (-0.56, -0.07)</b> |
| High                       | -0.01 (-0.37, 0.35)         | -0.33 (-0.76, 0.10)         | 0.15 (-0.20, 0.50)       | -0.18 (-0.64, 0.28)         | 0.05 (-0.32, 0.43)  | 0.16 (-0.83, 1.14)       | -0.24 (-0.83, 0.35)         | <b>-0.90 (-1.78, -0.01)</b> |
| <b>Smoking</b>             |                             |                             |                          |                             |                     |                          |                             |                             |
| Non-smoker                 | Ref                         | Ref                         | Ref                      | Ref                         | Ref                 | Ref                      | Ref                         | Ref                         |
| current smoker             | -0.11 (-0.32, 0.10)         | -0.09 (-0.30, 0.12)         | -0.03 (-0.26, 0.20)      | -0.15 (-0.29, 0.00)         | 0.12 (-0.07, 0.32)  | 0.14 (-0.05, 0.33)       | 0.03 (-0.22, 0.29)          | 0.13 (-0.07, 0.32)          |
| Former smoker              | -0.05 (-0.36, 0.26)         | 0.16 (-0.08, 0.41)          | -0.12 (-0.61, 0.37)      | 0.05 (0.25, 0.35)           | -0.13 (-0.71, 0.46) | -0.08 (-0.38, 0.22)      | 0.15 (-0.27, 0.58)          | 0.32 (-0.02, 0.66)          |
| <b>Hypertension (Yes)</b>  | 0.01 (-0.18, 0.20)          | -0.13 (-0.35, 0.10)         | <b>0.24 (0.07, 0.42)</b> | <b>0.33 (0.15, 0.51)</b>    | 0.24 (-0.02, 0.50)  | <b>0.23 (0.06, 0.40)</b> | <b>0.24 (0.02, 0.47)</b>    | <b>0.33 (0.12, 0.55)</b>    |

|                                       |                          |                             |                             |                             |                          |                          |                             |                             |
|---------------------------------------|--------------------------|-----------------------------|-----------------------------|-----------------------------|--------------------------|--------------------------|-----------------------------|-----------------------------|
| <b>Cholesterol (High)</b>             | 0.21 (-0.40, 0.83)       | -0.24 (-0.05, 0.54)         | 0.29 (-0.25, 0.83)          | -0.06 (-0.33, 0.21)         | -0.27 (0.78, 0.24)       | 0.02 (-0.29, 0.33)       | 0.19 (-0.52, 0.90)          | -0.31 (-0.70, 0.09)         |
| <b>HDL (High)</b>                     | 0.08 (-0.19, 0.36)       | -0.14 (0.-0.35, 0.07)       | <b>-0.24 (-0.44, -0.04)</b> | <b>-0.19 (-0.35, -0.03)</b> | 0.02 (-0.24, 0.28)       | -0.14 (-0.32, 0.04)      | <b>-0.32 (-0.59, -0.04)</b> | <b>-0.40 (-0.64, -0.16)</b> |
| <b>LDL (High)</b>                     | 0.24 (-0.49, 0.98)       | -0.26 (-0.66, 0.14)         | -0.20 (-0.73, 0.34)         | 0.22 (-0.10, 0.55)          | 0.36 (-0.15, 0.87)       | 0.08 (-0.29, 0.45)       | -0.38 (-1.13, 0.37)         | -0.01 (-0.47, 0.50)         |
| <b>Depression (yes)</b>               | -0.03 (-0.39, 0.32)      | 0.27 (-0.02, 0.57)          | 0.27 (-0.22, 0.75)          | 0.07 (-0.21, 0.34)          | 0.14 (-0.19, 0.47)       | 0.12 (-0.22, 0.46)       | 0.16 (-0.30, 0.62)          | 0.24 (-0.05, 0.52)          |
| <b>Fruit &amp; vegetable intake</b>   | -0.07 (-0.45, 0.32)      | -0.15 (-0.53, 0.23)         | -0.15 (-0.54, 0.23)         | -0.06 (-0.68, 0.56)         | NA                       | 0.04 (-0.37, 0.46)       | NA                          | NA                          |
| <b>Fish serve</b>                     | 0.10 (-0.13, 0.32)       | -0.00 (-0.17, -0.17)        | 0.01 (-0.18, 0.20)          | 0.00 (-0.15, 0.16)          | -0.06 (-0.26, 0.15)      | -0.14 (-0.32, 0.04)      | 0.03 (-0.22, 0.29)          | 0.02 (-0.20, 0.23)          |
| <b>TBI (Yes)</b>                      | -0.02 (-0.26, 0.22)      | -0.04 (-0.28, 0.19)         | 0.22 (-0.02, 0.46)          | <b>0.27 (0.01, 0.52)</b>    | 0.16 (-0.14, 0.46)       | -0.15 (-0.48, 0.19)      | 0.10 (-0.24, 0.43)          | <b>0.35 (0.02, 0.68)</b>    |
| <b>Loneliness (Yes)</b>               | 0.22 (-0.25, 0.70)       | 0.38 (-0.02, 0.78)          | 0.29 (-0.21, 0.78)          | 0.04 (-0.28, 0.36)          | 0.30 (-0.21, 0.81)       | -0.01 (-0.39, 0.37)      | -0.08 (-0.80, 0.65)         | 0.08 (-0.34, 0.51)          |
| <b>Insufficient physical activity</b> | <b>0.34 (0.10, 0.58)</b> | -0.17 (-0.01, 0.36)         | -0.04 (-0.36, 0.29)         | 0.06 (-0.24, 0.36)          | 0.12 (-0.50, 0.75)       | 0.11 (-0.06, 0.28)       | -0.09 (-0.38, 0.20)         | 0.06 (-0.28, 0.17)          |
| <b>Cognitive activity</b>             |                          |                             |                             |                             |                          |                          |                             |                             |
| Low                                   | Ref                      | Ref                         | Not included                |                             | Not included             |                          | Not included                |                             |
| Moderate                              | 0.17 (-0.66, 1.00)       | 0.17 (-0.48, 0.82)          | Not included                |                             | Not included             |                          | Not included                |                             |
| High                                  | -0.37 (-1.21, 0.46)      | -0.28 (-0.88, 0.31)         | Not included                |                             | Not included             |                          | Not included                |                             |
| <b>Atrial Fibrillation</b>            | 0.11 (-0.17, 0.40)       | 0.13 (-0.11, 0.38)          | <b>0.26 (0.00, 0.51)</b>    | <b>0.44 (0.21, 0.67)</b>    | 0.13 (-0.30, 0.56)       | <b>0.40 (0.04, 0.75)</b> | 0.04 (-0.30, 0.39)          | 0.09 (-0.20, 0.39)          |
| <b>Sleep Problem</b>                  | -0.01 (-0.38, 0.36)      | <b>-0.34 (-0.56, -0.12)</b> | 0.20 (-0.18, 0.59)          | -0.15 (-0.35, 0.05)         | 0.50 (-0.26, 1.27)       | 0.11 (-0.13, 0.35)       | 0.05 (-0.37, 0.48)          | -0.10 (-0.39, 0.20)         |
| <b>Hearing loss</b>                   | 0.19 (-0.04, 0.43)       | 0.02 (-0.16, 0.19)          | 0.13 (-0.17, 0.42)          | 0.11 (-0.10, 0.32)          | -0.06 (-0.33, 0.22)      | 0.26 (-0.00, 0.52)       | -0.01 (-0.33, 0.31)         | 0.33 (0.03, 0.63)           |
| <b>Stroke</b>                         | <b>0.77 (0.58, 0.98)</b> | <b>0.50 (0.34, 0.65)</b>    | Not included                |                             | 0.11 (-0.33, 0.54)       | 0.39 (-0.26, 1.05)       | Not included                |                             |
| <b>MI</b>                             | -0.23 (-0.57, 0.11)      | -0.13 (-0.38, 0.11)         | 0.22 (-0.05, 0.49)          | <b>0.34 (0.06, 0.62)</b>    | Not included             |                          | Not included                |                             |
| <b>Diabetes</b>                       | 0.07 (-0.13, 0.27)       | 0.09 (-0.07, 0.26)          | 0.22 (-0.03, 0.47)          | <b>0.24 (0.03, 0.46)</b>    | <b>0.37 (0.13, 0.61)</b> | <b>0.43 (0.26, 0.61)</b> | Not included                |                             |
| <b>Constant</b>                       | -2.41 (-3.36, -1.46)     | -1.82 (-2.82, -0.81)        | -2.08 (-2.81, -1.35)        | -2.62 (-3.72, -1.51)        | -3.05 (-4.32, -1.79)     | -3.43 (-4.60, -2.25)     | -2.78 (-2.38, -2.19)        | -2.56 (-3.05, -2.08)        |

**Table S5: Points for DemNCD-LR risk prediction tools**

| Covariates                              | Dementia |        | Stroke       |        | MI           |        | Diabetes     |        |
|-----------------------------------------|----------|--------|--------------|--------|--------------|--------|--------------|--------|
|                                         | Male     | Female | Male         | Female | Male         | Female | Male         | Female |
| <b>Age</b>                              |          |        |              |        |              |        |              |        |
| 65-69                                   | -8       | -11    | -2           | -1     | 3            | 3      | 3            | 4      |
| 70-74                                   | 0        | 0      | 0            | 0      | 0            | 0      | 0            | 0      |
| 75-79                                   | 12       | 9      | 1            | 3      | 3            | 3      | 0            | -5     |
| 80-84                                   | 18       | 21     | 5            | 3      | 1            | 1      | -7           | -8     |
| 85-89                                   | 27       | 33     | -3           | 0      | -7           | 1      | -12          | -15    |
| 90+                                     | 42       | 35     | -7           | -20    | 9            | -5     | *            | *      |
| <b>Education</b>                        |          |        |              |        |              |        |              |        |
| Less than secondary                     | 8        | 4      | -1           | 3      | 1            | 7      | 0            | 7      |
| Upper secondary                         | 4        | 3      | 1            | 2      | -1           | 4      | -1           | 3      |
| Tertiary                                | 0        | 0      | 0            | 0      | 0            | 0      | 0            | 0      |
| <b>Obesity</b>                          |          |        |              |        |              |        |              |        |
| Underweight                             | 7        | 1      | 3            | -6     | 9            | -5     | *            | -12    |
| Normal Weight                           | 0        | 0      | 0            | 0      | 0            | 0      | 0            | 0      |
| Overweight                              | 0        | -3     | 1            | -2     | 5            | 2      | 12           | 4      |
| Obese                                   | 2        | -8     | 0            | -4     | 3            | 4      | 18           | 17     |
| <b>Alcohol Consumption</b>              |          |        |              |        |              |        |              |        |
| Low                                     | 0        | 0      | 0            | 0      | 0            | 0      | 0            | 0      |
| Moderate                                | -5       | -6     | 2            | -2     | 0            | -2     | -6           | -6     |
| High                                    | 0        | -7     | 3            | -4     | 1            | 3      | -5           | -18    |
| <b>Smoking</b>                          |          |        |              |        |              |        |              |        |
| Non-smoker                              | 0        | 0      | 0            | 0      | 0            | 0      | 0            | 0      |
| current smoker                          | -2       | -2     | -1           | -3     | 2            | 3      | 1            | 3      |
| Former smoker                           | -1       | 3      | -2           | 1      | -3           | -2     | 3            | 6      |
| <b>Hypertension (Yes)</b>               | 0        | -3     | 5            | 7      | 5            | 5      | 5            | 7      |
| <b>Cholesterol (High)</b>               | 4        | -5     | 6            | -1     | -5           | 0      | 4            | -6     |
| <b>HDL</b>                              | 2        | -3     | -5           | -4     | 0            | -3     | -6           | -8     |
| <b>LDL</b>                              | 5        | -5     | -4           | 4      | 7            | 2      | -8           | 0      |
| <b>Depression (yes)</b>                 | -1       | 5      | 5            | 1      | 3            | 2      | 3            | 5      |
| <b>Fruits and vegetable intake</b>      | -1       | -3     | -3           | -1     | NA           | 1      | NA           | NA     |
| <b>Fish serve</b>                       | 2        | 0      | 0            | 0      | -1           | 0      | 1            | 0      |
| <b>TBI (Yes)</b>                        | 0        | -1     | 4            | 5      | 3            | -3     | 2            | 7      |
| <b>Loneliness (Yes)</b>                 | 4        | 8      | 6            | 1      | 6            | 0      | -2           | 2      |
| <b>physical activity (insufficient)</b> | 7        | -3     | -1           | 1      | 2            | 2      | -2           | 1      |
| <b>Cognitive activity</b>               |          |        | Not included |        | Not included |        | Not included |        |
| Low                                     | 0        | 0      |              |        |              |        |              |        |
| Moderate                                | 3        | 3      |              |        |              |        |              |        |
| High                                    | -7       | -6     |              |        |              |        |              |        |
| <b>Atrial Fibrillation</b>              | 2        | 3      | 5            | 9      | 3            | 8      | 1            | 2      |
| <b>Sleep Problem</b>                    | 0        | -7     | 4            | -3     | 10           | 2      | 1            | -2     |
| <b>Hearing loss</b>                     | 4        | 0      | 3            | 2      | -1           | 5      | 0            | 7      |
| <b>Diabetes</b>                         | 1        | 2      | 4            | 5      | 7            | 9      | Not included |        |
| <b>Stroke</b>                           | 15       | 10     | Not included |        | 2            | 8      |              |        |
| <b>MI</b>                               | -5       | -3     | 4            | 7      | Not included |        |              |        |

**Table S6: Validation results of DemNCD-LR risk prediction tool**

| Validation data |        | Dementia |      |              | Stroke |      |              | MI   |      |              | Diabetes |      |              |
|-----------------|--------|----------|------|--------------|--------|------|--------------|------|------|--------------|----------|------|--------------|
|                 |        | n        | ROC  | 95% CI       | n      | ROC  | 95% CI       | n    | ROC  | 95% CI       | n        | ROC  | 95% CI       |
| Combined data   | Male   | 5217     | 0.70 | (0.68, 0.72) | 5552   | 0.57 | (0.54,0.60)  | 5146 | 0.67 | (0.65, 0.70) | 5044     | 0.69 | (0.65,0.72)  |
|                 | Female | 7487     | 0.66 | (0.64, 0.68) | 7945   | 0.61 | (0.59, 0.64) | 7887 | 0.65 | (0.62, 0.68) | 7368     | 0.63 | (0.59, 0.66) |
| Data components |        |          |      |              |        |      |              |      |      |              |          |      |              |
| ARIC            | Male   | 831      | 0.71 | (0.67, 0.76) | 830    | 0.62 | (0.57, 0.68) | 746  | 0.57 | (0.52, 0.62) | 607      | 0.61 | (0.54, 0.67) |
|                 | Female | 1139     | 0.72 | (0.68, 0.76) | 1156   | 0.66 | (0.62, 0.70) | 1080 | 0.72 | (0.68, 0.76) | 861      | 0.59 | (0.54, 0.65) |
| CFAS I          | Male   | 1805     | 0.69 | (0.65, 0.73) | 1654   | 0.54 | (0.47, 0.61) | 1539 | 0.54 | (0.44, 0.64) | 1695     | 0.60 | (0.52, 0.68) |
|                 | Female | 2746     | 0.71 | (0.68, 0.74) | 2566   | 0.62 | (0.54, 0.69) | 2542 | 0.67 | (0.56, 0.78) | 2585     | 0.55 | (0.46, 0.64) |
| CFAS II         | Male   | 1181     | 0.65 | (0.54, 0.76) | 1095   | 0.55 | (0.40, 0.70) | 1006 | 0.53 | (0.12, 0.94) | 1004     | 0.67 | (0.57, 0.78) |
|                 | Female | 1377     | 0.76 | (0.69, 0.82) | 1310   | 0.77 | (0.63, 0.91) | 1339 | 0.48 | (0.30, 0.66) | 1256     | 0.53 | (0.39, 0.66) |
| CHS             | Male   | 476      | 0.67 | (0.60, 0.74) | 828    | 0.57 | (0.52, 0.62) | 739  | 0.54 | (0.50, 0.59) | 670      | 0.67 | (0.59, 0.75) |
|                 | Female | 704      | 0.69 | (0.63, 0.74) | 1156   | 0.54 | (0.50, 0.58) | 1106 | 0.52 | (0.48, 0.57) | 989      | 0.68 | (0.62, 0.74) |
| FHS             | Male   | 209      | 0.51 | (0.43, 0.59) | 483    | 0.57 | (0.48, 0.66) | 463  | 0.53 | (0.42, 0.60) | 439      | 0.67 | (0.50, 0.84) |
|                 | Female | 314      | 0.45 | (0.39, 0.51) | 599    | 0.63 | (0.57, 0.69) | 609  | 0.50 | (0.41, 0.58) | 541      | 0.65 | (0.53, 0.77) |
| ADAMS           | Male   | 94       | 0.66 | (0.52, 0.80) | 98     | 0.52 | (0.00, 1.00) |      | N/A  |              | NA       |      |              |
|                 | Female | 104      | 0.57 | (0.45, 0.70) | 125    | 0.71 | (0.32, 1.00) |      |      |              |          |      |              |
| MAAS            | Male   | 89       | 0.66 | (0.45, 0.88) |        |      |              | 77   | 0.43 | (0.16, 0.70) | 82       | 0.55 | (0.32, 0.78) |
|                 | Female | 85       | 0.55 | (0.37, 0.73) | N/A    |      |              | 85   | 0.55 | (0.33, 0.76) | 75       | 0.73 | (0.58, 0.87) |
| MAP             | Male   | 175      | 0.59 | (0.49, 0.68) | 175    | 0.37 | (0.22, 0.53) | 161  | 0.56 | (0.40, 0.72) | 154      | 0.75 | (0.64, 0.86) |
|                 | Female | 522      | 0.64 | (0.59, 0.69) | 491    | 0.67 | (0.57, 0.77) | 504  | 0.62 | (0.46, 0.71) | 486      | 0.69 | (0.60, 0.77) |
| MAS             | Male   | 162      | 0.65 | (0.55, 0.75) | 155    | 0.55 | (0.36, 0.75) | 138  | 0.62 | (0.40, 0.84) | NA       |      |              |
|                 | Female | 199      | 0.55 | (0.45, 0.66) | 192    | 0.46 | (0.28, 0.63) | 185  | 0.57 | (0.28, 0.86) |          |      |              |
| SLAS I          | Male   | 195      | 0.77 | (0.62, 0.92) | 179    | 0.68 | (0.41, 0.95) | 183  | 0.65 | (0.46, 0.84) | 161      | 0.50 | (0.30, 0.70) |
|                 | Female | 297      | 0.73 | (0.57, 0.89) | 293    | 0.66 | (0.33, 0.99) | 293  | 0.42 | (0.00, 0.89) | 250      | 0.60 | (0.38, 0.82) |

**Table S7: Hosmer Lemeshow goodness of fit for the DemNCD-LR in the validation dataset.**

| Validation data |        | Dementia |       |          | Stroke |       |          | MI   |       |          | Diabetes |        |          |
|-----------------|--------|----------|-------|----------|--------|-------|----------|------|-------|----------|----------|--------|----------|
|                 |        | n        | HL    | p-values | n      | HL    | p-values | n    | HL    | p-values | n        | HL     | p-values |
| Combined data   | Male   | 5217     | 29.29 | 0.04     | 5552   | 9.55  | 0.89     | 5146 | 24.92 | 0.10     | 5858     | 22.04  | 0.23     |
|                 | Female | 7487     | 18.16 | 0.45     | 7945   | 38.67 | <0.01    | 7887 | 45.78 | <0.001   | 8525     | 117.73 | <0.001   |
| Data components |        |          |       |          |        |       |          |      |       |          |          |        |          |
| ARIC            | Male   | 831      | 5.10  | 0.75     | 830    | 6.9   | 0.55     | 746  | 10.73 | 0.22     | 862      | 10.51  | 0.21     |
|                 | Female | 1139     | 9.69  | 0.29     | 1156   | 9.33  | 0.32     | 1080 | 9.38  | 0.31     | 1188     | 9.98   | 0.27     |
| CFAS I          | Male   | 1805     | 24.19 | 0.15     | 1654   | 12.39 | 0.58     | 1539 | 11.54 | 0.57     | 1805     | 14.02  | 0.60     |
|                 | Female | 2746     | 13.19 | 0.11     | 2566   | 7.84  | 0.35     | 2542 | 4.99  | 0.76     | 2746     | 3.10   | 0.93     |
| CFAS II         | Male   | 1181     | 6.51  | 0.59     | 1095   | 1.77  | 0.99     | 1006 | 8.41  | 0.39     | 1237     | 5.21   | 0.73     |
|                 | Female | 1377     | 7.71  | 0.46     | 1310   | 6.84  | 0.55     | 1339 | 8.12  | 0.42     | 1479     | 8.14   | 0.42     |
| CHS             | Male   | 476      | 10.72 | 0.22     | 828    | 10.27 | 0.25     | 739  | 12.94 | 0.11     | 665      | 6.04   | 0.64     |
|                 | Female | 704      | 10.82 | 0.21     | 1156   | 8.50  | 0.39     | 1106 | 4.28  | 0.83     | 991      | 6.04   | 0.61     |
| FHS             | Male   | 209      | 10.28 | 0.25     | 483    | 13.43 | 0.10     | 463  | 14.22 | 0.08     | 343      | 10.37  | 0.24     |
|                 | Female | 314      | 9.21  | 0.32     | 599    | 9.00  | 0.34     | 609  | 5.32  | 0.72     | 499      | 15.20  | 0.06     |
| ADAMS           | Male   | 94       | 11.12 | 0.20     | 98     | 5.07  | 0.75     |      | N/A   |          | 122      | 9.24   | 0.32     |
|                 | Female | 104      | 6.12  | 0.63     | 125    | 8.07  | 0.43     |      |       |          | 174      | 1.89   | 0.98     |
| MAAS            | Male   | 89       | 7.86  | 0.45     |        |       |          | 77   | 7.96  | 0.44     | 198      | 7.14   | 0.52     |
|                 | Female | 85       | 5.30  | 0.73     | N/A    |       |          | 84   | 7.12  | 0.52     | 199      | 6.44   | 0.60     |
| MAP             | Male   | 175      | 5.33  | 0.72     | 175    | 7.92  | 0.44     | 161  | 4.88  | 0.77     | 148      | 15.72  | 0.05     |
|                 | Female | 522      | 5.98  | 0.65     | 491    | 1.23  | 0.99     | 504  | 3.24  | 0.92     | 467      | 11.10  | 0.20     |
| MAS             | Male   | 162      | 7.62  | 0.47     | 155    | 11.58 | 0.17     | 138  | 8.90  | 0.26     | 162      | 13.24  | 0.10     |
|                 | Female | 199      | 6.04  | 0.64     | 192    | 5.50  | 0.60     | 185  | 9.06  | 0.34     | 199      | 10.78  | 0.21     |
| SLAS I          | Male   | 195      | 7.06  | 0.53     | 179    | 10.01 | 0.26     | 183  | 11.49 | 0.18     | 316      | 13.38  | 0.10     |
|                 | Female | 297      | 24.44 | <0.01    | 293    | 5.43  | 0.71     | 293  | 4.49  | 0.81     | 583      | 11.07  | 0.20     |

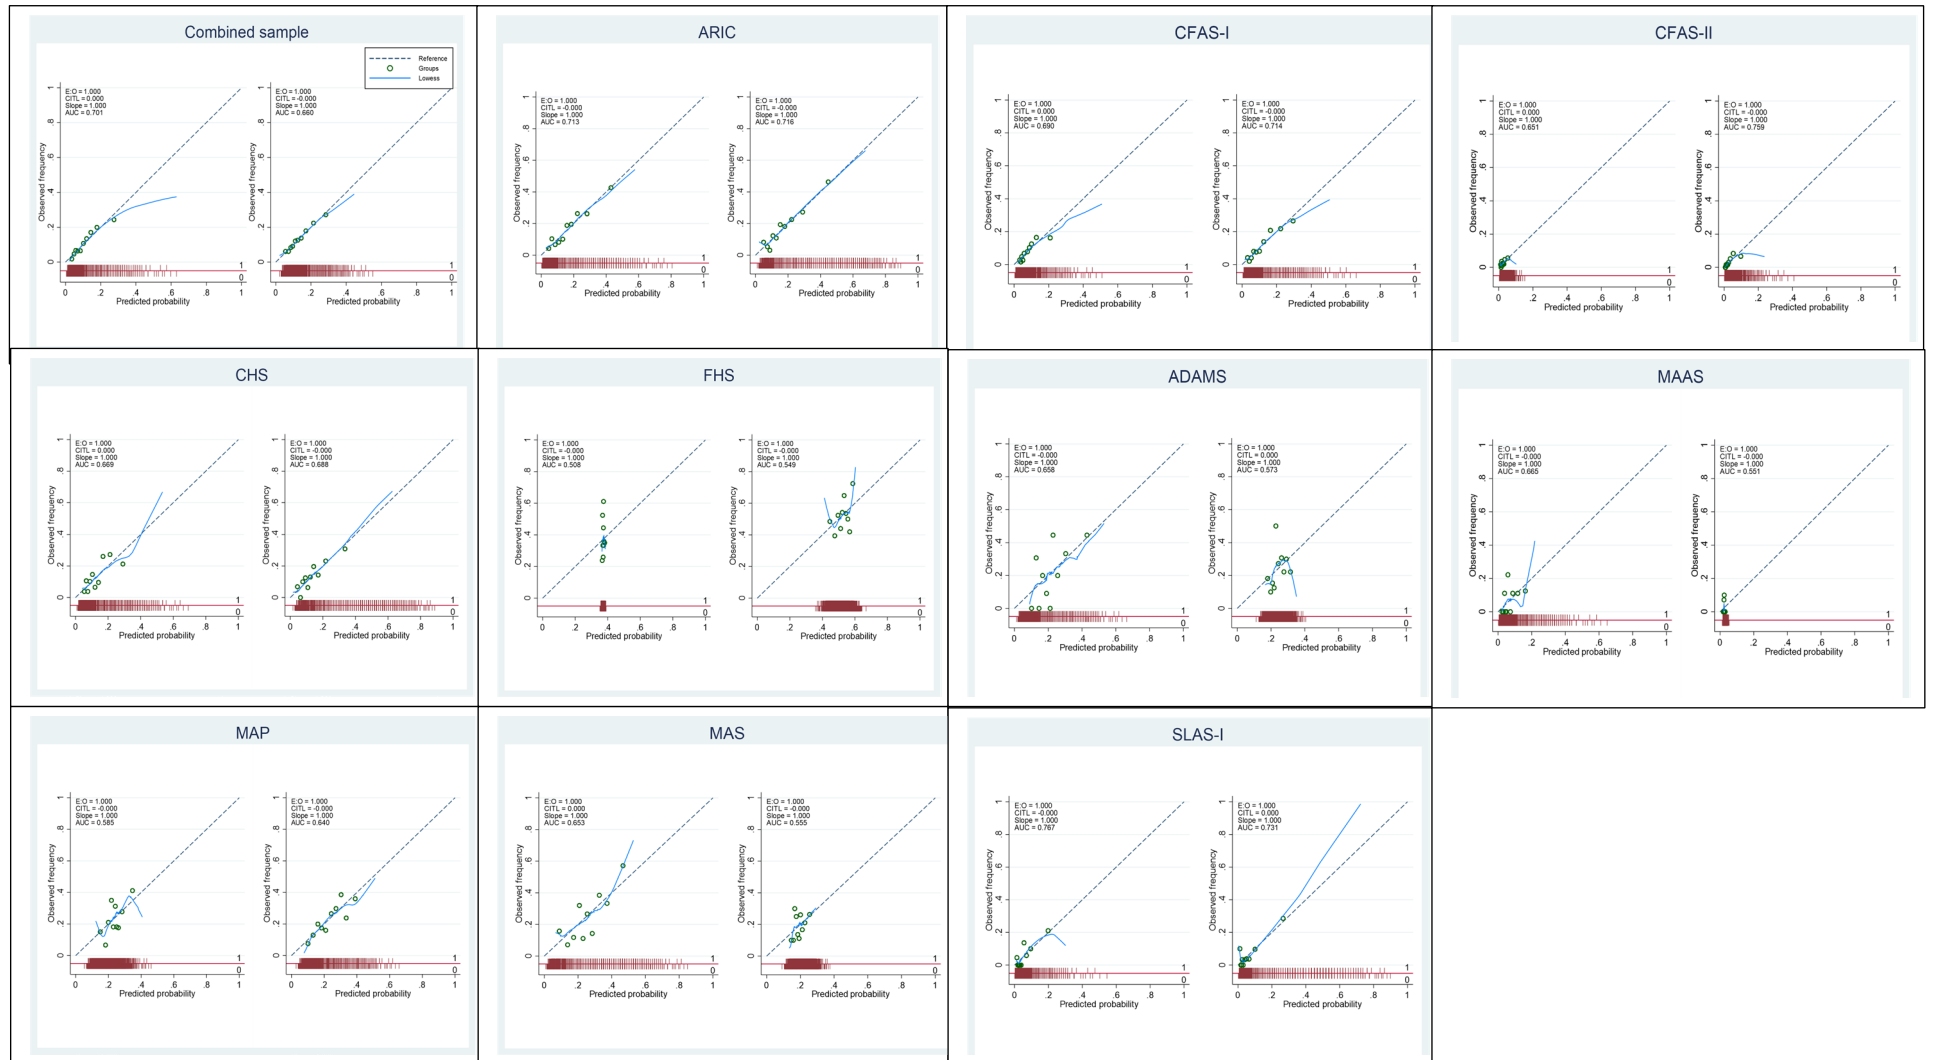

Figure S2: Calibration plot of observed against expected probabilities for assessment of DemNCD-LR performance for predicting dementia

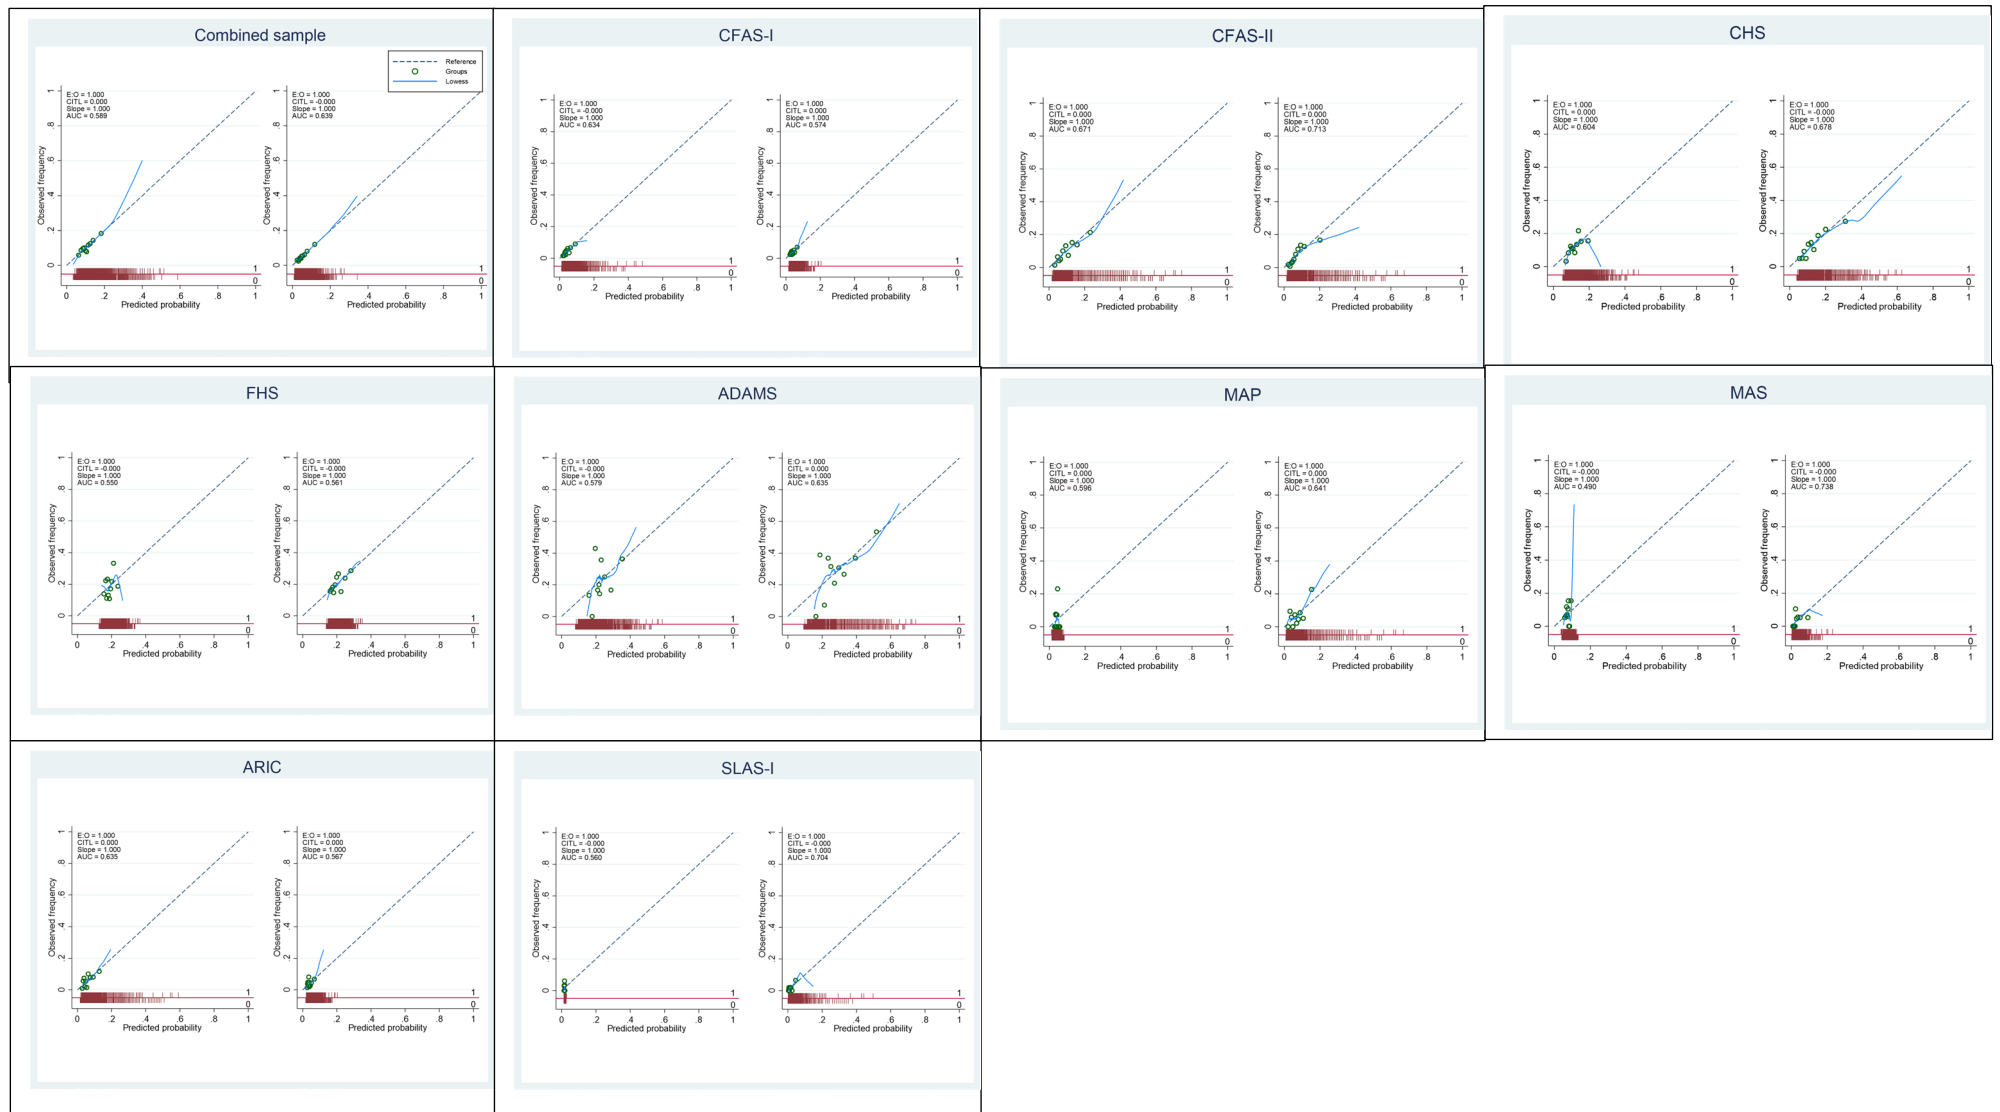

Figure S3: Calibration plot of observed against expected probabilities for assessment of DemNCD-LR performance for predicting stroke.

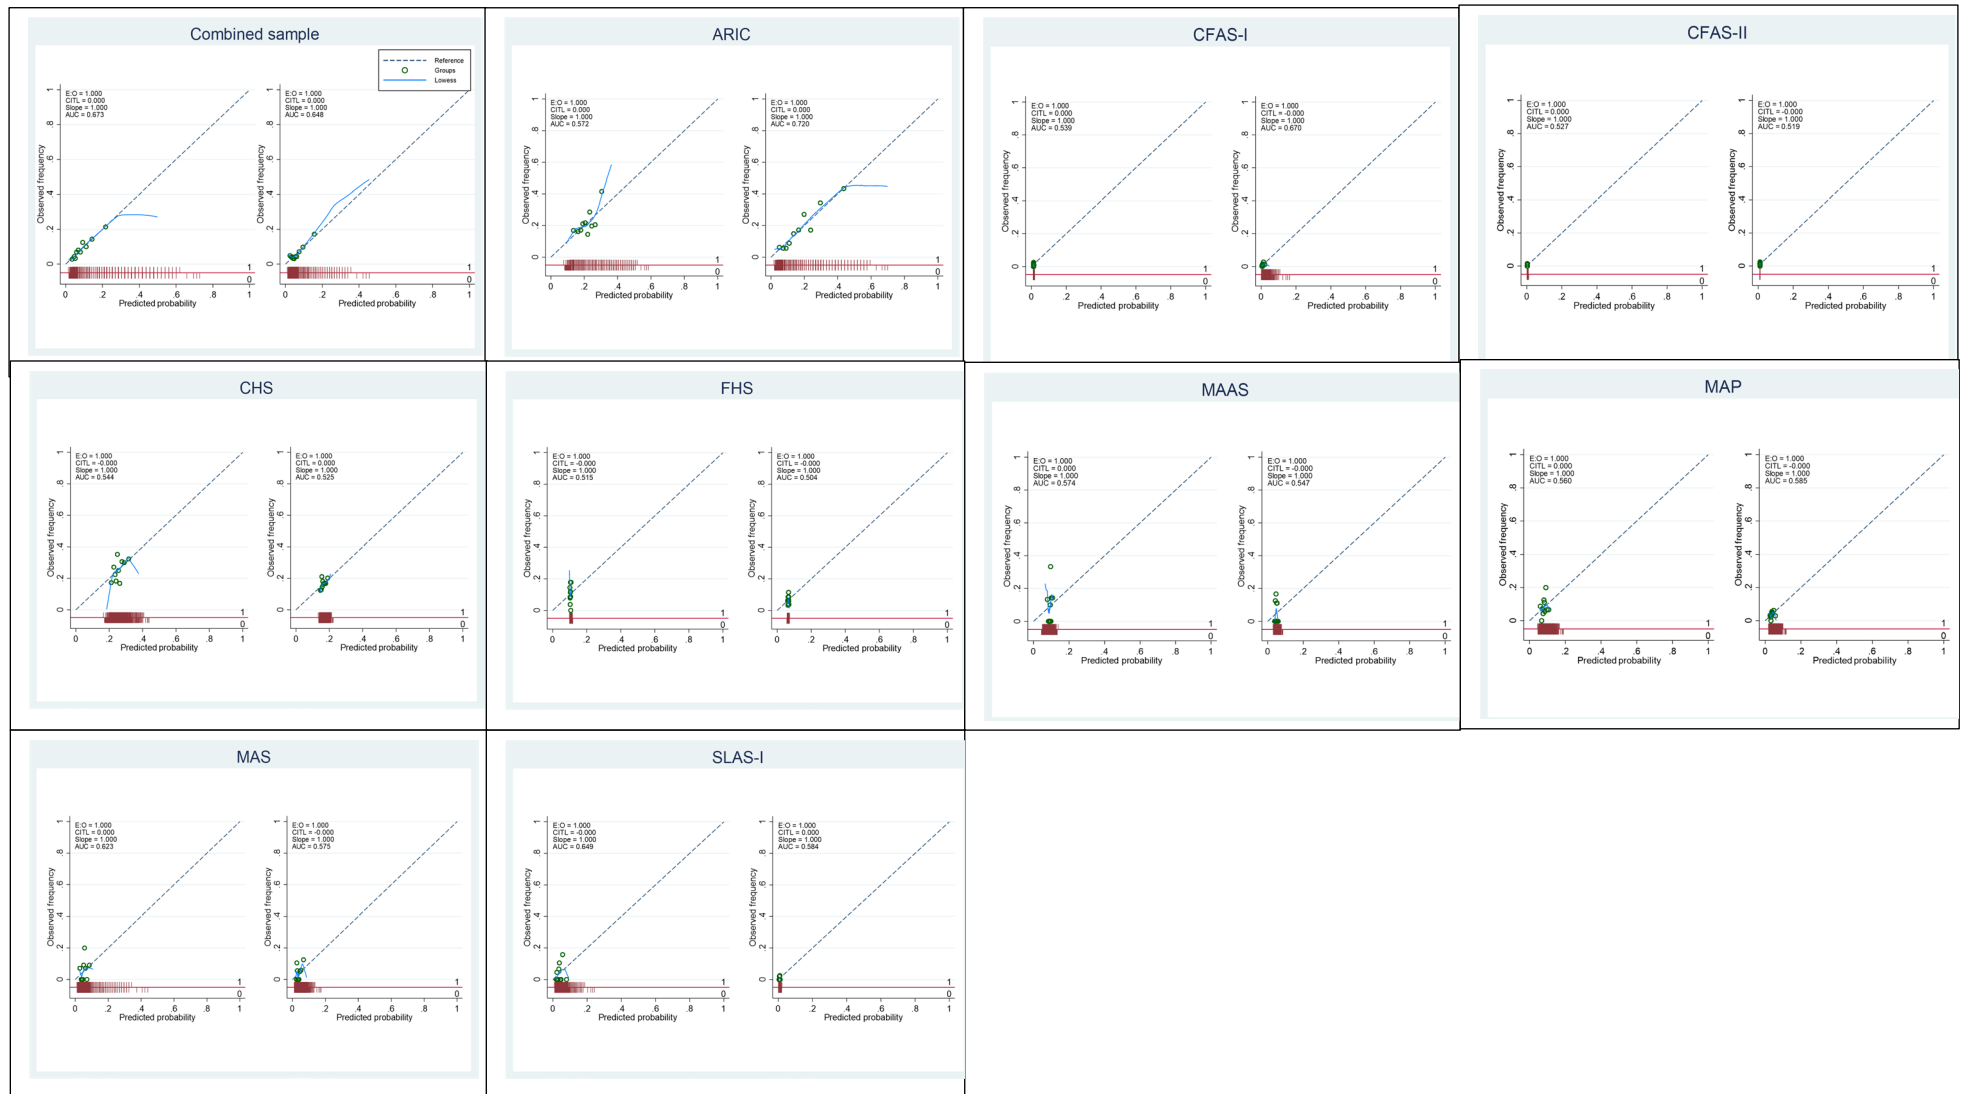

Figure S4: Calibration plot of observed against expected probabilities for assessment of DemNCD-LR performance for predicting MI.



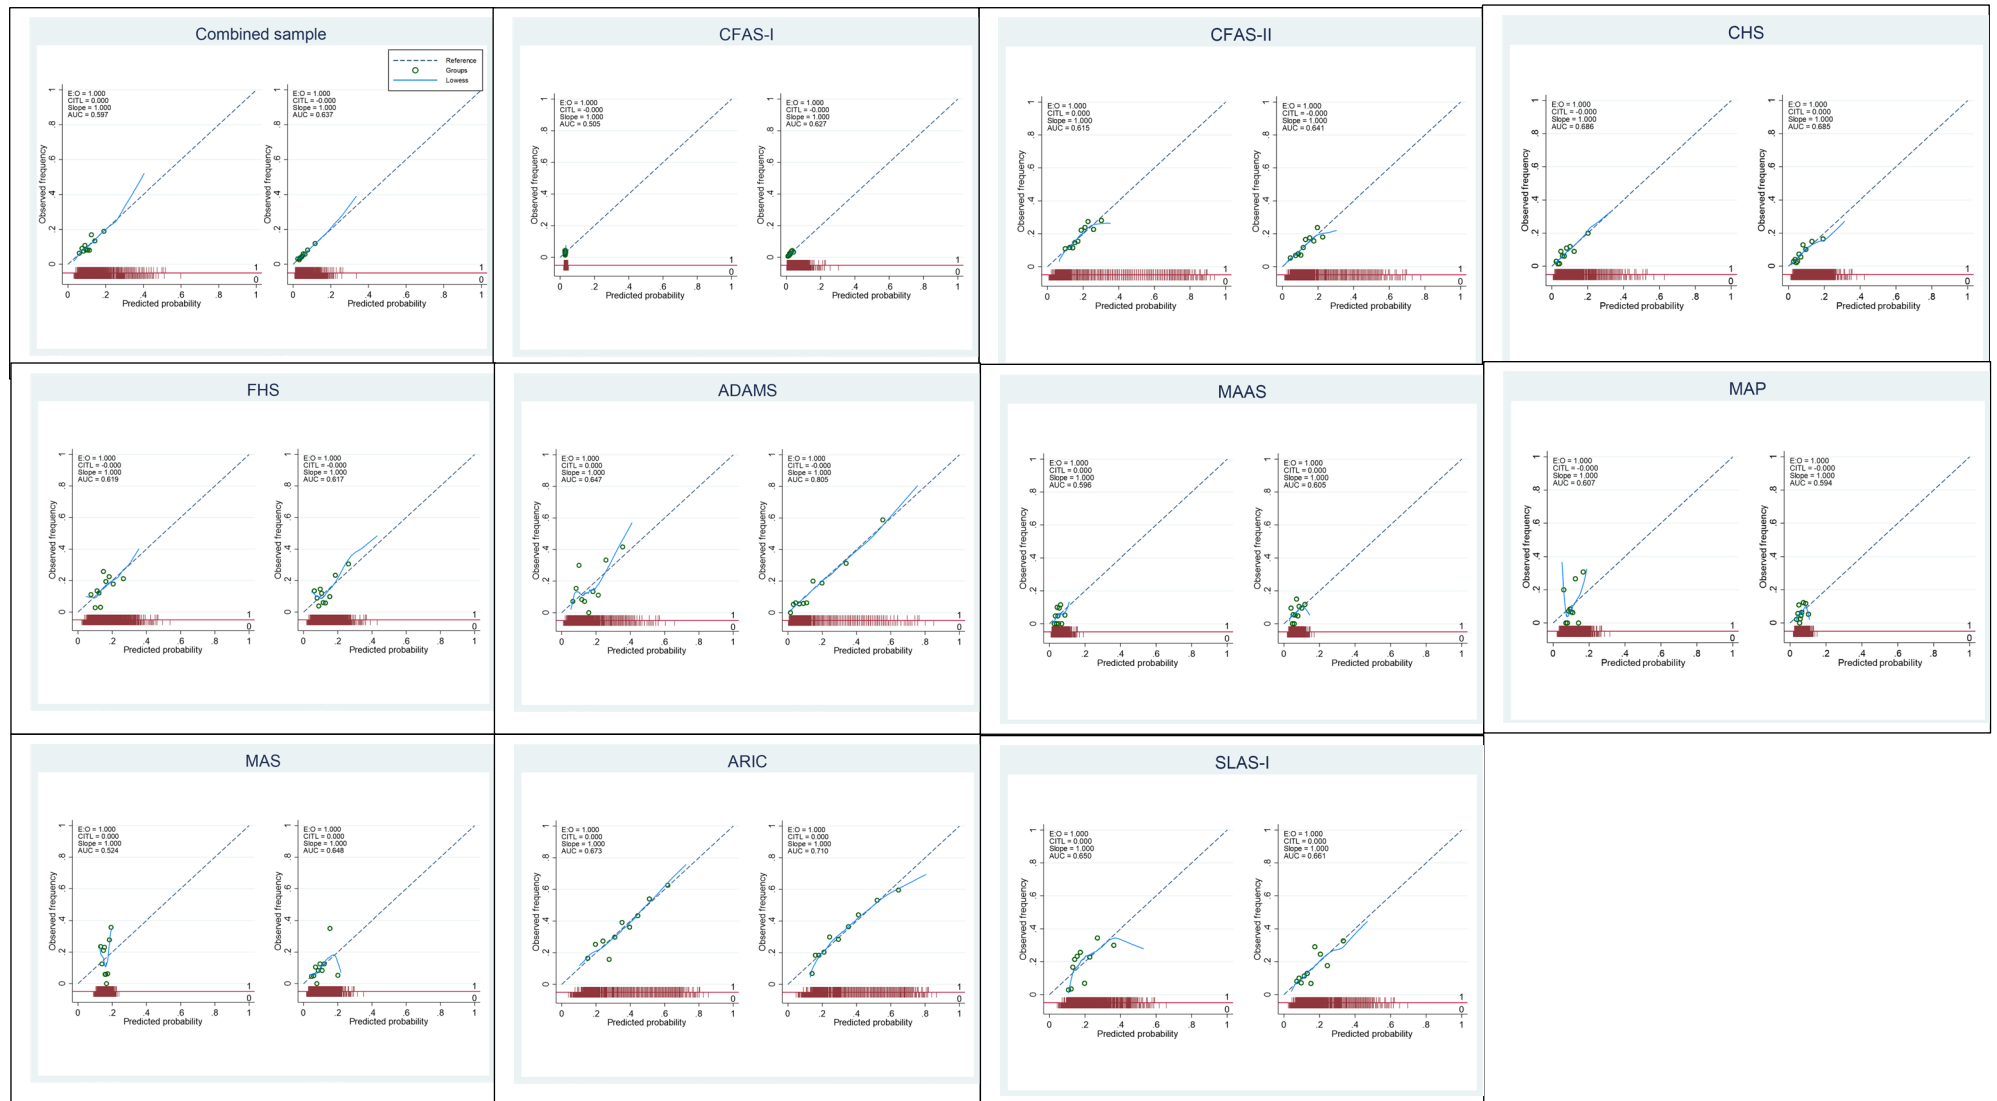

Figure S5: Calibration plot of observed against expected probabilities for assessment of DemNCD-LR performance for predicting diabetes

**Table S8: Comparison of sensitivity, specificity for a given cutoff of DemNCD-LR risk scores for males and females.**

| For males                                                  |                      | Model data    |                      |                 |                 | Validation data    |                 |                 |
|------------------------------------------------------------|----------------------|---------------|----------------------|-----------------|-----------------|--------------------|-----------------|-----------------|
| Outcome DemNCD-LR score Range                              | Quantile cutoff (>=) | Cut-off Score | OR                   | Sensitivity (%) | Specificity (%) | OR                 | Sensitivity (%) | Specificity (%) |
| <b>Dementia (Model data: -28,71) (Validation: -55, 69)</b> | 16.6%                | -5            | 2.62 (1.73, 3.97)    | 96.9            | 18.8            | 1.75 (1.10, 2.79)  | 94.7            | 18.8            |
|                                                            | 33.3%                | 2             | 4.16 (2.80, 6.19)    | 88.9            | 36.9            | 1.93 (1.22, 3.04)  | 86.3            | 35.9            |
|                                                            | 50%                  | 9             | 6.07 (4.13, 8.91)    | 77.2            | 53.8            | 3.39 (2.21, 5.19)  | 77.0            | 53.1            |
|                                                            | 66.7%                | 16            | 9.38 (6.44, 13.65)   | 60.7            | 70.1            | 5.92 (3.96, 8.87)  | 61.6            | 69.4            |
|                                                            | 83.3%                | 24            | 15.15 (10.48, 21.91) | 36.3            | 85.7            | 8.54 (5.75, 12.71) | 34.9            | 85.4            |
| <b>Stroke (Model data:-17, 30) Validation: -28, 36)</b>    | 16.6%                | 0             | 1.27 (0.98, 1.64)    | 87.2            | 19.0            | 1.36 (0.95, 1.99)  | 86.2            | 19.4            |
|                                                            | 33.3%                | 3             | 1.14 (0.92, 1.63)    | 71.1            | 37.8            | 1.19 (0.79, 1.80)  | 69.0            | 37.1            |
|                                                            | 50%                  | 5             | 1.54 (1.20, 1.98)    | 60.1            | 51.2            | 1.20 (0.83, 1.73)  | 58.5            | 49.6            |
|                                                            | 66.7%                | 8             | 1.75 (1.37, 2.25)    | 41.3            | 69.3            | 1.64 (1.16, 2.34)  | 42.5            | 68.4            |
|                                                            | 83.3%                | 12            | 2.30 (1.79, 2.96)    | 20.6            | 86.8            | 2.21 (1.56, 3.13)  | 22.1            | 85.9            |
| <b>MI (Model data: -13, 38; Validation: -12, 39)</b>       | 16.6%                | 3             | 1.57 (1.06, 2.31)    | 94.2            | 19.9            | 1.72 (1.05, 2.83)  | 94.0            | 19.8            |
|                                                            | 33.3%                | 6             | 2.27 (1.57, 3.29)    | 86.1            | 37.7            | 3.04 (1.92, 4.82)  | 84.9            | 37.3            |
|                                                            | 50%                  | 9             | 3.48 (2.45, 4.93)    | 75.3            | 53.9            | 3.17 (2.01, 4.98)  | 70.9            | 52.5            |
|                                                            | 66.7%                | 12            | 4.97 (3.56, 6.92)    | 59.7            | 69.3            | 3.91 (2.52, 6.06)  | 55.1            | 69.0            |
|                                                            | 83.3%                | 17            | 8.77 (6.34, 12.12)   | 35.1            | 86.3            | 8.38 (5.50, 12.76) | 34.4            | 86.4            |
| <b>Diabetes (Model data: -26, 34; Validation: -24,30)</b>  | 16.6%                | -4            | 1.67 (1.12, 2.49)    | 92.1            | 19.0            | 0.63 (0.36, 1.11)  | 88.5            | 19.6            |
|                                                            | 33.3%                | 1             | 1.69 (1.05, 2.71)    | 76.5            | 41.5            | 1.15 (0.63, 2.08)  | 80.5            | 41.4            |
|                                                            | 50%                  | 3             | 1.76 (1.16, 2.67)    | 69.2            | 51.8            | 1.28 (0.78, 2.11)  | 73.6            | 51.6            |
|                                                            | 66.7%                | 6             | 2.55 (1.71, 3.80)    | 56.4            | 69.3            | 1.92 (1.21, 3.06)  | 60.2            | 69.4            |
|                                                            | 83.3%                | 11            | 6.36 (4.44, 9.12)    | 39.7            | 85.0            | 3.88 (3.27, 7.51)  | 41.8            | 85.7            |
| <b>For females</b>                                         |                      |               |                      |                 |                 |                    |                 |                 |
| <b>Dementia (Model data: -53,51) (Validation: -55, 69)</b> | 16.6%                | -15           | 1.12 (0.89, 1.42)    | 92.7            | 18.4            | 1.16 (0.91, 1.45)  | 91.4            | 19.7            |
|                                                            | 33.3%                | -7            | 1.80 (1.45, 2.24)    | 84.4            | 37.0            | 1.73 (1.38, 2.17)  | 82.9            | 36.3            |
|                                                            | 50%                  | 1             | 2.38 (1.93, 2.93)    | 72.1            | 54.2            | 2.00 (1.60, 2.48)  | 70.0            | 53.3            |
|                                                            | 66.7%                | 10            | 3.77 (3.09, 4.61)    | 55.4            | 71.9            | 3.53 (2.87, 4.34)  | 54.8            | 70.7            |
|                                                            | 83.3%                | 22            | 6.36 (5.24, 7.73)    | 32.4            | 87.2            | 5.07 (4.15, 6.20)  | 31.0            | 86.1            |

|                                                                  |       |    |                   |      |      |                   |      |      |
|------------------------------------------------------------------|-------|----|-------------------|------|------|-------------------|------|------|
|                                                                  |       |    |                   |      |      |                   |      |      |
| <b>Stroke</b><br>(Model data: -31, 33;<br>Validation: -28, 36)   | 16.6% | -3 | 1.25 (1.00, 1.56) | 88.2 | 17.4 | 1.15 (0.91, 1.46) | 78.6 | 30.1 |
|                                                                  | 33.3% | 1  | 1.06 (0.85, 1.32) | 73.4 | 34.8 | 1.19 (0.95, 1.50) | 65.2 | 48.2 |
|                                                                  | 50%   | 4  | 1.38 (1.11, 1.71) | 59.9 | 53.7 | 1.09 (0.84, 1.41) | 57.1 | 58.6 |
|                                                                  | 66.7% | 7  | 1.59 (1.29, 1.97) | 44.2 | 70.4 | 1.64 (1.32, 2.03) | 42.8 | 74.3 |
|                                                                  | 83.3% | 11 | 2.90 (2.37, 2.54) | 27.0 | 86.3 | 2.62 (2.15, 3.21) | 26.3 | 88.1 |
|                                                                  |       |    |                   |      |      |                   |      |      |
| <b>MI</b><br>(Model data: -12, 50;<br>Validation: -10, 51)       | 16.6% | 6  | 0.87 (0.65, 1.17) | 88.4 | 20.1 | 0.71 (0.49, 1.04) | 85.8 | 18.8 |
|                                                                  | 33.3% | 9  | 0.95 (0.71, 1.26) | 79.8 | 36.9 | 0.74 (0.50, 1.09) | 76.2 | 36.8 |
|                                                                  | 50%   | 12 | 1.38 (1.05, 1.81) | 70.4 | 54.0 | 0.97 (0.67, 1.41) | 66.7 | 53.6 |
|                                                                  | 66.7% | 15 | 2.03 (1.60, 2.58) | 58.6 | 68.7 | 1.49 (1.08, 2.04) | 56.3 | 67.9 |
|                                                                  | 83.3% | 21 | 4.92 (3.93, 6.15) | 37.0 | 87.0 | 3.46 (2.58, 4.63) | 35.6 | 86.4 |
|                                                                  |       |    |                   |      |      |                   |      |      |
| <b>Diabetes</b><br>(Model data: -45, 46;<br>Validation: -38, 44) | 16.6% | -6 | 1.54 (1.08, 2.21) | 92.8 | 17.6 | 1.18 (0.77, 1.82) | 88.5 | 17.5 |
|                                                                  | 33.3% | 0  | 1.79 (1.24, 2.56) | 80.7 | 36.7 | 0.96 (0.60, 1.54) | 73.3 | 37.0 |
|                                                                  | 50%   | 4  | 2.04 (1.44, 2.91) | 68.8 | 52.8 | 1.16 (0.74, 1.83) | 63.3 | 52.8 |
|                                                                  | 66.7% | 8  | 2.77 (1.98, 3.87) | 55.5 | 68.6 | 1.62 (1.07, 2.45) | 51.5 | 68.3 |
|                                                                  | 83.3% | 14 | 6.02 (4.41, 8.23) | 36.6 | 85.2 | 3.43 (2.35, 5.01) | 33.6 | 85.1 |

**Table S9: Validation of DemNCD and DemNCD-LR risk tools with age only model in the combined sample**

| <b>Model</b>     | <b>Sex</b> | <b>Dementia</b> |                           | <b>Stroke</b> |                           | <b>MI</b> |                           | <b>Diabetes</b> |                           |
|------------------|------------|-----------------|---------------------------|---------------|---------------------------|-----------|---------------------------|-----------------|---------------------------|
|                  |            | <b>n</b>        | <b>Harrel' C (95% CI)</b> | <b>n</b>      | <b>Harrel' C (95% CI)</b> | <b>n</b>  | <b>Harrel' C (95% CI)</b> | <b>n</b>        | <b>Harrel' C (95% CI)</b> |
| <b>DemNCD</b>    | Male       | 4862            | 0.68 (0.65, 0.70)         | 5073          | 0.53 (0.49, 0.56)         | 4631      | 0.51 (0.48, 0.54)         | 4607            | 0.51 (0.47, 0.55)         |
|                  | Female     | 6924            | 0.69 (0.67, 0.71)         | 7323          | 0.56 (0.54, 0.59)         | 7205      | 0.53 (0.50, 0.56)         | 6807            | 0.51 (0.48, 0.55)         |
|                  |            |                 |                           |               |                           |           |                           |                 |                           |
| <b>DemNCD-LR</b> |            | <b>n</b>        | <b>AUC (95% CI)</b>       | <b>n</b>      | <b>AUC (95% CI)</b>       | <b>n</b>  | <b>AUC (95% CI)</b>       | <b>n</b>        | <b>AUC (95% CI)</b>       |
|                  | Male       | 5217            | 0.66 (0.64, 0.68)         | 5552          | 0.53 (0.50, 0.56)         | 5147      | 0.48 (0.45, 0.50)         | 5044            | 0.54 (0.51, 0.57)         |
|                  | Female     | 7487            | 0.66 (0.64, 0.68)         | 7945          | 0.56 (0.54, 0.58)         | 7887      | 0.48 (0.46, 0.50)         | 7368            | 0.55 (0.52, 0.58)         |
